# Supplementary material
Source: PubMed Central journal article supplement (PMC8195878)
Supplement: Supp_Fig1.pdf [file Supp_Fig1.pdf]

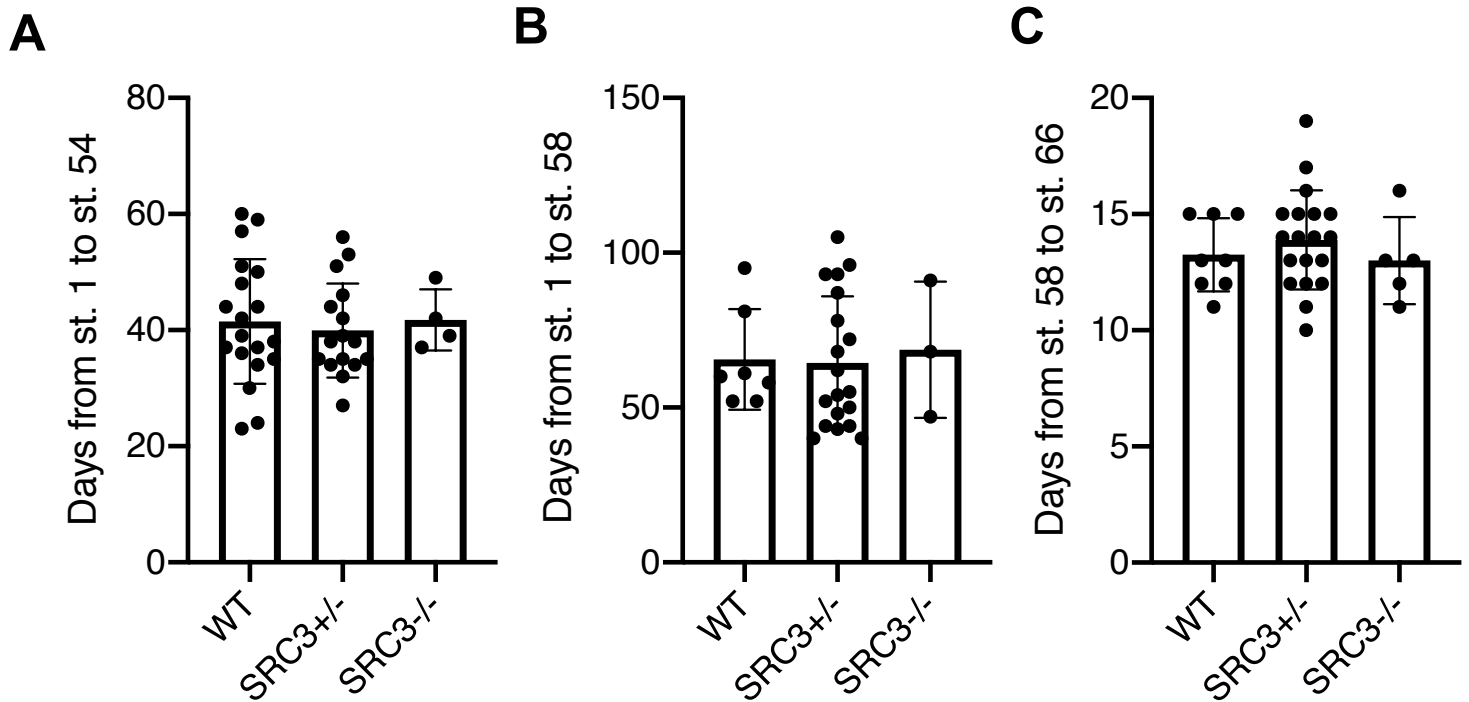

**Supplemental Figure 1.** SRC3 knockout does not affect gross development. The time for each individual animals to development from fertilization (stage 1) to the onset of metamorphosis (stage 54) **(A)**, the beginning of metamorphosis climax (stage 58) **(B)**, or from stage 58 to the end of metamorphosis (stage 66) **(C)** was measured for sibling wild type (WT), SRC heterozygous knockout (SRC3(+/-)) and homozygous knockout (SRC3(-/-)) tadpoles during natural metamorphosis based on external morphological criteria. All tadpoles were housed in same tank and genotyped when each tadpole reached stage 54 or 58. Animals at stage 58 were then reared individually to measure the time to reach stage 66. Note that there was no significant differences among the three genotypes for any of the three periods measured.
