# Supplementary material
Source: PubMed Central journal article supplement (PMC8195878)
Supplement: Supp_Fig3.pdf [file Supp_Fig3.pdf]

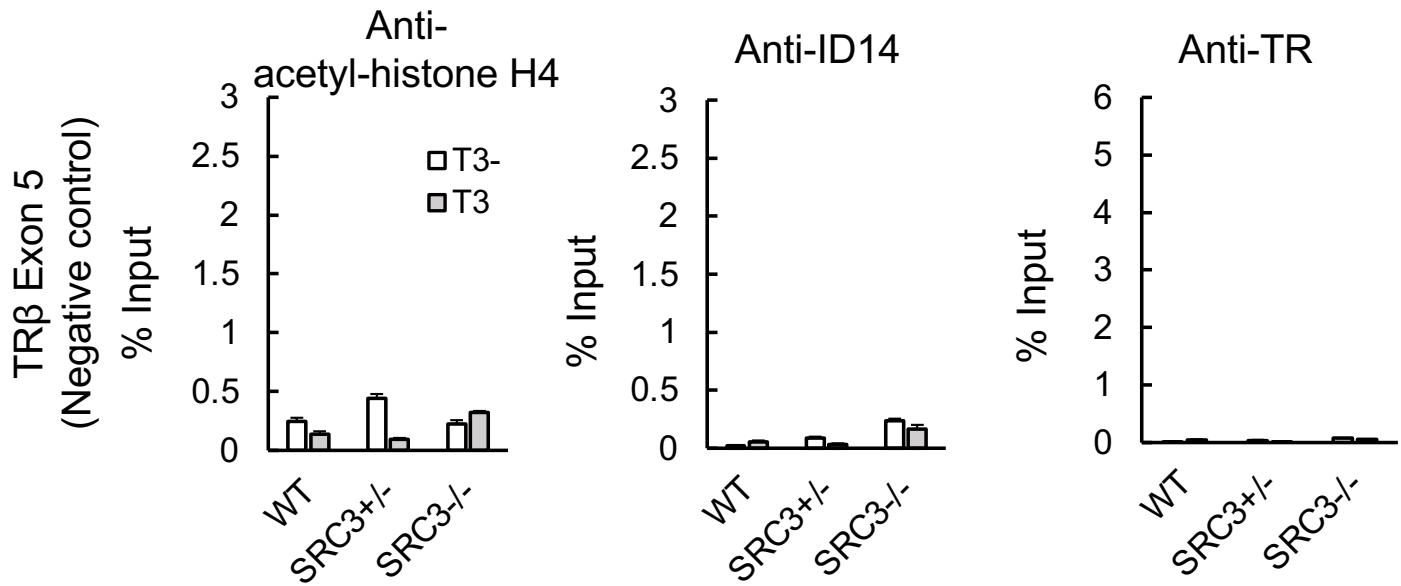

**Supplemental Figure 3.** ChIP assay for a negative control region, TR $\beta$  exon 5. ChIP assay was performed on intestine samples with antibodies against acetyl-histone H4 and TR or the control ID14, an extracellular protein. The immunoprecipitated DNA was analyzed by qPCR for the presence of TR $\beta$  exon 5 region as a negative control. Error bars indicate SEM. Note that there are only low levels of signals for all samples with antibodies against TR or the control ID14. For acetyl-histone H4, expectedly, some acetylation was present in the transcribed region of the TR $\beta$  gene, although at only lower levels compared to TR $\beta$  TRE region (Fig. 3B).
